# Supplementary material for: Detection of leukocoria using a soft fusion of expert classifiers under non-clinical settings
Source: PubMed Central journal article supplement (PMC4167153; doi:10.1186/1471-2415-14-110), 2014-09-09
Supplement: 12886_2014_472_MOESM1_ESM.pdf [file 12886_2014_472_MOESM1_ESM.pdf]

Input image

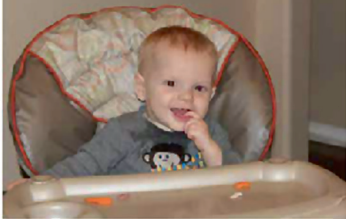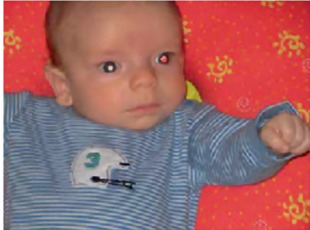

Face and eyes  
detection

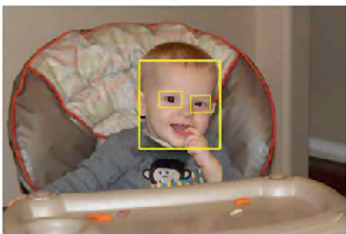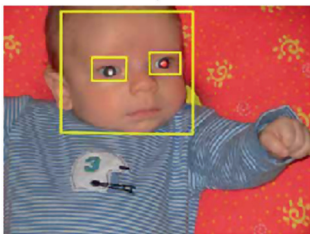

Inputs to algorithm  
for classification

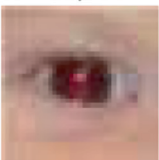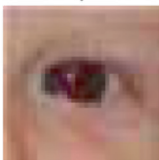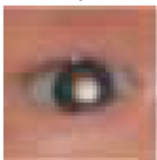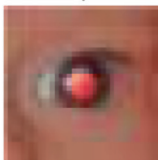

Classification algorithm

Predicted  
Class

Healthy

Healthy

Leukocoric

Leukocoric
