# Supplementary material for: Detection of leukocoria using a soft fusion of expert classifiers under non-clinical settings
Source: PubMed Central journal article supplement (PMC4167153; doi:10.1186/1471-2415-14-110), 2014-09-09

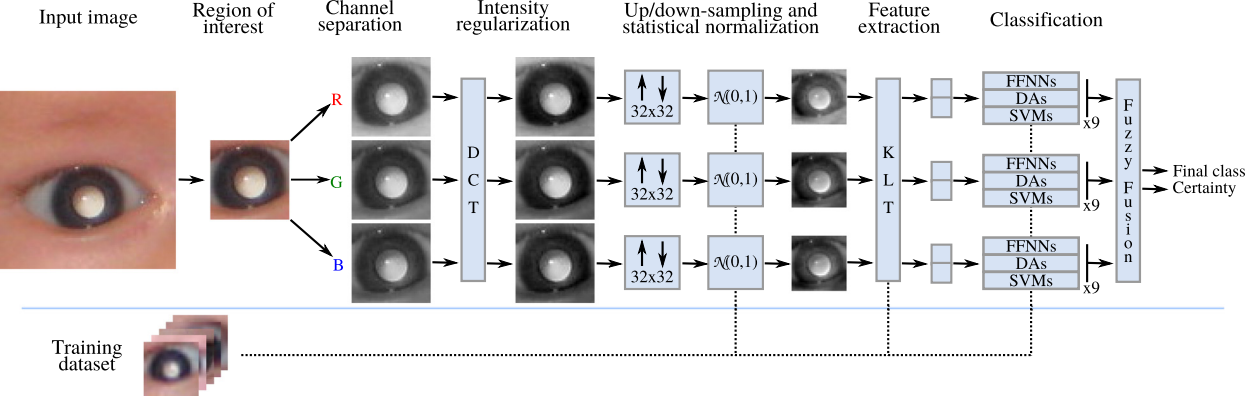

Supplement: 12886_2014_472_MOESM3_ESM.pdf [file 12886_2014_472_MOESM3_ESM.pdf]
